# Supplementary material for: The AI Paradox in L2 Writing: Why Helpful Feedback Creates Unhelpful Dependency in Higher Education
Source: Research Square preprint supplement (doi:10.21203/rs.3.rs-8731897/v2), 2026-02-18
Supplement: Supplementary file 1 [file a152527f07b35e75815f16e4.docx]

**Appendix A**

**Study Corpus with ADS Framework Classification**

**Dimension 1: Loss of confidence in unaided production**

| **Author (Year)** | **Study Type** | **Primary Outcome** | **Key ADS Evidence** | **Role in Framework** |
| --- | --- | --- | --- | --- |
| Bandura (1986) | Theoretical Framework | Self-efficacy & agency in learning | Self-efficacy essential for human agency; reciprocal determinism; low self-efficacy triggers dependency cycles | **Theoretical Foundation**: Explains psychological mechanism of autonomy loss |
| Barrot (2021) | Quasi-experimental | L2 writing accuracy improvement | AWCF improves accuracy BUT self-directed learning questioned; stronger effects for lower-proficiency (dependency risk) | **Transition Evidence**: Shows how scaffolding can mask dependency |
| Barrot (2022) | Technology Review | Grammarly affordances & limitations | Robust affordances BUT false positives, limited explanations, metacognitive challenges for autonomy | **Design Critique**: Identifies how tools undermine metacognitive development |
| Benson (2011) | Theoretical Framework | Loss of Confidence in Unaided Production | Framework for understanding what “autonomy” means and how AI undermines metacognitive dimensions | **Theoretical Foundation**: Provides theoretical grounding so ADS isn't just "empirical observation" but "disruption of established autonomy theory" |
| Budiyono et al. (2025) | Qualitative case study | Long-term effects of sustained AI writing tool use (Grammarly, ChatGPT, Jasper, Gemini, Copy AI, Jenni) | Students report they "don't think through ideas as much"; "gotten lazy"; "rely on it too much" | **Loss of Confidence:** explicit skill atrophy, reduced confidence without tools, passive learning. Explicit participant language about dependence mechanisms |
| Chapelle et al. (2015) | Experimental/TOEFL Research | AI assessment reliability | Automated scoring systems promise BUT require validation; early stage of autonomy concerns | **Early Evidence**: Foundational concerns about AI assessment systems |
| Chen et al. (2022) | Qualitative | AWE-supported writing as tool-mediated activity | Tool-mediated activity limits students’ control; individual factors shape dependency patterns | **Process Evidence**: Shows how tools reshape writing process |
| Dizon & Gayed (2021) | Counterbalanced Experimental | Grammarly improves grammatical accuracy and lexical richness | Grammatical improvement BUT no effect on syntactic complexity or fluency; questions about what autonomy means | **Selectivity Evidence**: Tools only help with surface features, not deep writing |
| Dizon & Gold (2023) | Experimental/Mixed-methods | Grammarly reduces FLA, promotes learner autonomy | Reduces anxiety & promotes autonomy BUT at what cost to long-term development? | **Paradox Evidence**: Positive outcomes alongside autonomy concerns |
| Fan et al. (2025) | Randomized Experimental | AI may trigger metacognitive laziness despite improving task performance | Improves essay scores BUT doesn’t boost intrinsic motivation or knowledge transfer; reduces metacognitive engagement (laziness) | **Critical Paradox**: Performance gains with motivation/metacognition loss |
| Gayed et al. (2022) | Quasi-experimental (counterbalanced design, N=10) | AI KAKU (word prediction + reverse translation) on lexical diversity and fluency | Tool improves syntactic complexity BUT minimal effect on lexical diversity; students report less perceived effort but lack deep training | **Transition Evidence:** Shows how word prediction tools provide convenience without ensuring deep skill development; cognitive scaffolding reduces perceived effort but questions remain about knowledge transfer |
| Li et al. (2017) | Quasi-experimental | AWE impact on grammatical accuracy vs discourse-level features | Significantly improves grammatical accuracy; minimal effect on discourse-level features; surface-level correction focus | **Surface-Level Pattern**: Reveals why autonomy erodes (tool limits development) |
| Link et al. (2014) | Longitudinal Qualitative | Instructor practices & AWE implementation challenges | Instructors adapt AWE; balance with human feedback; concerns about student over-reliance; positive shift after learning curve | **Implementation Pattern**: Shows how teachers attempt to mitigate autonomy loss |
| Liu et al. (2023) | Quasi-experimental | Reflective thinking promotes effectiveness of AI-supported EFL writing | Improves essay scores AND self-efficacy BUT reflective thinking mechanism NEEDED to prevent erosion | **Protective Factor Evidence**: Shows reflective thinking can offset dependency |
| Lo et al. (2025) | Randomized Controlled Trial | AI-generated ChatGPT feedback vs. instructor feedback on essay revision quality, engagement, motivation, emotional responses | Effect primarily through motivation/engagement, NOT emotion; students perceive feedback as "helpful" but express concerns about dependency and long-term learning | **Paradox Evidence:** Performance improvements with motivation gains BUT students report concerns about over-reliance, reduced learning, and inability to write without AI |
| Michel et al. (2025) | Mixed-methods classroom-based intervention | How GenAI influences collaborative writing revision when students compare own text with AI-generated model syntheses | Differential engagement by proficiency: students accept AI suggestions selectively (patchwriting concerns); high-proficiency writers focus on content/structure (TREs), low-proficiency on grammar (LREs) | **Protective Factor Evidence:** Structured collaborative comparison tasks with deliberation CAN offset approval bias; explicit instruction to compare and evaluate own vs. AI text triggers critical thinking |
| Ranalli (2021) | Multiple Case Study (Qualitative) | L2 student engagement with AWE feedback; trust dimensions affecting learning | Trust more determinant than proficiency; uncritical acceptance when trusted; most feedback ignored due to distrust; metacognitive challenges | **Trust Mechanism**: Explains why engagement varies despite similar tools |
| Shi et al. (2025) | Mixed-methods Quasi-experimental | AI writing assistant with learning analytics on writing performance | Improves writing quality BUT excessive reliance deprives students of “learner agency” and impacts “ideal L2 writing self” | **Identity Impact**: Documents erosion at identity/self-concept level |
| Tang (2025) | Qualitative (Phenomenological) | Learner experiences using ChatGPT for writing revision | Increases confidence BUT copy-paste behaviors indicate uncritical, passive engagement; over-reliance concerns | **Behavioral Evidence**: Passive engagement patterns document agency loss |
| Warschauer & Grimes (2008) | Mixed-methods Ethnographic | Technology integration, access, and equity in writing instruction | Technology access doesn’t automatically improve writing; tools compromise autonomy without pedagogical integration | **Early Warning**: Foundational evidence that tools alone undermine autonomy |
| Wei et al. (2023) | Randomized Controlled Trial (RCT) | L2 writing skills across multiple dimensions | Significantly improves all writing dimensions; writing self-efficacy significant predictor; stronger effects for lower-proficiency learners (dependency risk) | **Equity Concern**: Shows how tools differentially create dependency in lower-proficiency learners |
| Zhang & Hyland (2018) | Naturalistic Case Study | Student engagement (behavioral, affective, cognitive) with teacher vs automated feedback | Engagement crucial mediating variable; highly engaged outperformed moderately engaged; affective factors & cognitive strategies essential | **Engagement Framework**: Shows engagement quality determines autonomy outcomes |
| Zhang et al. (2024) | Quantitative Survey Study (I-PACE Model) | AI dependency antecedents & consequences on problematic AI usage | Academic self-efficacy inversely related to AI dependency; academic stress & performance expectations mediate relationship; documents five negative effects (laziness, misinformation, lower creativity, reduced critical thinking, decreased independent thinking) | **Systemic Mechanism**: Documents full cycle of autonomy erosion through reduced self-efficacy |

**Dimension 2: Algorithmic Approval Bias**

| **Author (Year)** | **Study Type** | **Primary Outcome** | **Key ADS Evidence** | **Role in Framework** |
| --- | --- | --- | --- | --- |
| Canale & Swain (1980) | Theoretical Framework | Communicative competence in L2 | Competence multidimensional (grammatical, sociolinguistic, discourse, strategic); grammatical competence insufficient | **Theoretical Foundation**: Framework showing how algorithmic reduction violates communicative competence |
| Chen & Cui (2022) | Mixed-methods Comparative | AWE vs peer feedback on cohesion/coherence | Peer feedback superior to AWE for coherence; AWE lacks interactive feedback for discourse features; students standardize wording to conform to system | **Approval Bias Evidence**: Students prioritize system conformity over communicative goals |
| Ziqi et al. (2024) | Quasi-experimental Mixed-methods | L2 students’ revision strategies and barriers to AI feedback | 38% of feedback rejected; accept form-focused (68.1%) more than content-focused (58.6%); barriers include overload, repetitive comments; misinterpretation of author intent | **Selective Uptake Pattern**: Students accept surface feedback, reject deep feedback |
| Koltovskaia (2020) | Qualitative (Multiple case study) | Student engagement with automated written corrective feedback | Students revise contrary to writer’s intent to satisfy system; treat AWE as authoritative despite conflicting preferences | **Intent-Conformity Conflict**: Documents gap between communicative intent and algorithmic approval |
| Mo & Crosthwaite (2025) | Quantitative/Comparative | Comparative effectiveness of ChatGPT vs Grammarly feedback | Both improve essay quality; different profiles (ChatGPT: complex sentences; Grammarly: accuracy); when writing conforms to LLM patterns, risks losing personal touch and becoming robotic | **Voice Loss Evidence**: Shows how algorithmic conformity sacrifices authentic expression |
| Rahimi et al. (2025) | Mixed Methods (Survey + Focus Groups) | Learner and teacher perceptions of ChatGPT feedback | AI-edited texts grammatically correct BUT rarely improve coherence or flow; writing success reinterpreted as meeting technical standards rather than audience engagement | **Success Redefinition**: Algorithm becomes arbiter of “good” writing |
| Ranalli (2021) | Multiple Case Study (Qualitative) | L2 student engagement with AWE feedback; trust dimensions affecting learning | When trusted, feedback accepted uncritically; revisions made contrary to writer’s communicative intent simply because system recommended them | **Uncritical Acceptance Pattern**: Trust enables approval-seeking behavior |
| Yan & Zhang (2024) | Mixed-method Multiple Case Study | L2 writers’ behavioral, cognitive, and affective engagement with ChatGPT feedback | Trapped in endless cycles of adjusting prompts (sometimes thousands of iterations) to satisfy algorithm rather than engage actual readers; less receptive to content feedback | **Endless Iteration Evidence**: Documents obsessive approval-seeking behavior |
| Zhang (2020) | Qualitative Multiple Case Study | Student engagement with AWE feedback through perceptions and revision operations | Students treat AWE as authoritative despite conflicting preferences; selective processing of AWE feedback; employed six revision types but prioritized algorithm-approved edits | **Authority Pattern**: Algorithm elevated above writer’s judgment |
| Zhan & Yan (2025) | Unobtrusive Observations + Stimulated Recall | Student engagement with ChatGPT feedback across four dimensions | Cognitive strategies more than metacognitive; behavioral engagement superficial; students need feedback literacy including prompt engineering; writing success redefined as lack of algorithmic warning signs | **Superficial Engagement**: Behavioral engagement driven by algorithm approval rather than learning |
| Ziqi et al. (2024) | Qualitative Thematic Analysis with Lag Sequential Analysis | L2 writers’ engagement patterns with ChatGPT AWCF; metacognitive regulation | Much less receptive to recommendations regarding content or deeper meaning; almost always accept grammar/coherence feedback; shows reductionist competence interpretation | **Surface Prioritization**: Demonstrates clear bias toward surface-level feedback acceptance |

**Dimension 3: Internalization of AI norms**

| **Author (Year)** | **Study Type** | **Primary Outcome** | **Key ADS Evidence** | **Role in Framework** |
| --- | --- | --- | --- | --- |
| Agarwal et al. (2025) | Experimental (Cross-cultural controlled) | Writing style homogenization, cultural nuance loss | AI homogenizes writing toward Western styles; reduces cultural diversity; different efficiency for different cultures; documents “AI colonialism” | **Colonialism Evidence**: Explicitly shows how AI drives homogenization and erases cultural expression |
| Bender et al. (2021) | Conceptual/  Position Paper | Environmental & bias risks of large LMs | Large LMs carry significant environmental, social, and bias risks; trained on unfiltered internet data reflecting dominant norms, stereotypes, assumptions | **Theoretical Critique**: Foundational analysis of how biases enter LLMs |
| Casal & Kessler (2023) | Mixed Methods (Survey + Interviews) | AI vs human writing detection capability | Reviewers correctly identified AI-generated abstracts <40% of the time; invisibility makes algorithmic influence hard to notice and resist; users unknowingly adopt AI-generated language | **Invisibility Mechanism**: Shows how undetectable influence aids ideological internalization |
| Chae & Davidson (2025) | Methodological comparative study | Comparative analysis of zero-shot, few-shot, fine-tuning, and instruction-tuning approaches for stance detection | Users accept model outputs based on authority/sophistication, not accuracy verification; structured JSON inputs show models reproduce stereotypes/biases from training data | **Design Critique:** Documents how LLM design choices (architecture, training regime, prompt engineering) shape what users accept; shows mechanism of automation bias—users trust outputs without verification |
| Dixon-Román et al. (2020) | Critical/Theoretical Analysis | Algorithmic bias and racializing assemblages in AI education tools | AI algorithms function as “racializing assemblages”; perpetuate social inequity through embedded assumptions about student writing; algorithms present biases as neutral technical choices | **Systemic Inequity**: Documents how AI reproduces racial hierarchies invisibly |
| Giles et al., (1973) | Theoretical/  Empirical (Communication) | Speech accommodation and social identity in language use | Speakers adjust language toward interlocutors based on social motivations; language reflects group identity and accommodation dynamics | **Theoretical Foundation**: Convergence theory explaining how users align with AI |
| Gramsci (1971) | Theoretical/Political Philosophy | Hegemony and cultural reproduction through institutions | Knowledge and technology embedded in social relations; cultural domination maintained through consent and institutions; dominant norms naturalized without conscious resistance | **Theoretical Foundation**: Explains how algorithmic norms become naturalized as common sense |
| Jakesch et al. (2023) | Experimental (Co-writing) | Co-writing with opinionated LMs affects users’ opinions and writing | Opinionated LMs shift both writing content and user attitudes; users largely unaware of influence (72% accept aligned suggestions vs 15% notice bias); learners adopt AI rhetorical stance/style | **Unconscious Adoption**: Shows how users unknowingly internalize AI voice and positions |
| Kuteeva & Andersson (2024) | Critical Forum Article | Tension between decolonization goals and AI-driven language standardization | LLMs drive knowledge toward homogeneity despite decolonization goals; default to standardized English, constrain linguistic diversity; lack agency, metacognition, rhetorical flexibility | **Decolonization Threat**: Documents how AI undermines linguistically diverse scholarship |
| Lo (2025) | Qualitative/Critical Ecological | AI affordances and challenges in Global Englishes material development | AI enhances material development BUT rigid curricula limit implementation; AI inaccuracies and enforced standardization undermine Global Englishes pedagogy; standardization threatens linguistic diversity | **Pedagogy Threat**: Shows how AI enforced standardization conflicts with equity goals |
| Matras (2011) | Theoretical/Linguistics | Mechanisms of language convergence in linguistic areas | Language change driven by speaker agency; convergence involves both linguistic matter and patterns; parallels to stylistic convergence driven by algorithmic feedback | **Theoretical Foundation**: Linguistic theory parallel to style convergence concept |
| Norton (2000) | Theoretical/Sociocultural | Identity, social practice, and language learning | Learner identity and social positioning shape language learning; language learning embedded in power relations; investment concept more nuanced than motivation | **Theoretical Foundation**: Shows how internalization reshapes identity and investment in learning |
| Pickering & Garrod (2004) | Theoretical/  Cognitive | Mechanisms of language alignment in dialogue | Speakers align on multiple linguistic levels; alignment supports coordination and dialogue management; explains how AI influences user adaptation through interactive processes | **Theoretical Foundation**: Dialogue alignment theory explaining AI-user convergence |
| Tran & Stell (2024) | Qualitative (Interview-based) | Learner experiences and barriers using ChatGPT for academic writing | LLMs marginalize local varieties and dialects by defaulting to standard forms; systematically reproduce linguistic hierarchies that historically disadvantaged non-dominant speech communities | **Linguistic Hierarchy Evidence**: Documents how AI perpetuates dialect discrimination |
| Warr & Heath (2025) | Quantitative (Survey) | Prevalence and patterns of LLM use for academic writing | 67% of students use LLMs; LLM feedback tends to be significantly more critical of writing styles linked to marginalized communities while favoring mainstream Western English; actively reproduces social hierarchies | **Bias Measurement**: Empirical documentation of how AI feedback discriminates against non-dominant varieties |
